# Supplementary material for: Staff resilience and innovation essential to New York City diabetes prevention programs going virtual during COVID-19 pandemic lockdowns
Source: Springer Nature journal article supplement (doi:10.1186/s12913-023-10129-y), 2023-10-25
Supplement: MOESM2 [file 26222114]

# Diabetes Prevention Programs in NYC study: Intake Form

CUNY Universal Integrated IRB Protocol: 2021-0194, Approved: 3/12/2021  
Evaluation of Diabetes Prevention Programs in NYC during COVID-19

---

\* Required

About you!

1. Please enter your six digit code (to protect your privacy we will only collect your assigned code). \*

\_\_\_\_\_

2. Indicate your role at this DPP. \*

Mark only one oval.

- Director  
 Coordinator  
 Lifestyle Coach  
 Other: \_\_\_\_\_

3. How long have you been a director, coordinator, lifestyle coach, and/or other persons involved in the recruitment, implementation or leadership of DPP(s)? \*

\_\_\_\_\_

4. Please list any credentials you may have. (eg. RD/RDN, CHES, CDCES, RN)

\_\_\_\_\_  
\_\_\_\_\_  
\_\_\_\_\_  
\_\_\_\_\_

## DPP Operations

5. What type of organization(s) hosts your DPP? Check all that apply. \*

Check all that apply.

- Hospital  
 Out-patient Clinic  
 Community-Based Organization (CBO)/Non-profit  
 Medical Practice  
 Private/For-profit company (eg. Weight Watchers, Noom)  
 Religious  
 Other: \_\_\_\_\_

6. What class type(s) do you offer? Check all that apply. \*

*Check all that apply.*

- Public
- Employee
- Member-only
- Other: \_\_\_\_\_

7. As a result of the pandemic, were sessions suspended at any point? \*

*Mark only one oval.*

- Yes
- No

8. If yes, how long were sessions suspended?

\_\_\_\_\_

9. Before the pandemic, what was your DPP session delivery mode? \*

*Check all that apply.*

- In-Person (delivered 100% in-person for all participants by trained Lifestyle Coaches)
- Online (delivered 100% online for all participants; independent learning)
- Distance Learning (delivered 100% by trained Lifestyle Coaches via remote classroom or telehealth (i.e., conference call or Skype))
- Combination (delivered as a combination of any of the previously defined delivery modes (1. – 3. above))

10. Did the delivery mode change as a result of the ongoing pandemic? \*

*Mark only one oval.*

- Yes
- No *Skip to question 12*

#### DPP Operation Changes

11. What delivery mode did you adopt as a result of the ongoing pandemic? Check all that apply. \*

*Check all that apply.*

- In-Person (delivered 100% in-person for all participants by trained Lifestyle Coaches)
- Online (delivered 100% online for all participants; independent learning)
- Distance Learning (delivered 100% by trained Lifestyle Coaches via remote classroom or telehealth (i.e., conference call or Skype))
- Combination (delivered as a combination of any of the previously defined delivery modes (1. – 3. above))
- Other: \_\_\_\_\_

#### DPP Participants

12. Before the pandemic, how many DPP participants did you typically serve each year? (Provide a single whole number, eg. 25) \*

\_\_\_\_\_

13. Before the pandemic, how did participants hear about your program? Check all that apply. \*

*Check all that apply.*

- Advertisements
- Community based organization referrals
- Federally Qualified Health Centers referrals
- Hospital referrals
- In-person outreach/flyers
- Medical office (private) referrals
- Social media
- Word of mouth
- Other: \_\_\_\_\_

14. As a result of the ongoing pandemic, how do participants currently hear about your program? Check all that apply. \*

*Check all that apply.*

- Advertisements
- Community-based organization referrals
- Federally Qualified Health Center referrals
- Hospital referrals
- In-person outreach/flyers
- Medical office (private) referral
- Social media
- Word of mouth
- No changes to outreach methods
- Other: \_\_\_\_\_

15. As a result of the ongoing pandemic, DPP participation has... \*

*Mark only one oval.*

- increased
- decreased
- stayed the same

16. List the main racial/ethnic/cultural groups that attend your DPP. Be as specific as possible. (eg. Black American, Cambodian, Chinese, Chilean, French, Garifuna, Ghanaian, Honduran, Jamaican, Nigerian, Puerto Rican, Russian, White American) \*

---

---

---

---

---

17. On average, what percentage of your DPP participants are foreign-born? (Provide a whole number, eg. 50%) \*

---
